# Supplementary material for: Aspirin for Venous Ulcers: Randomised Trial (AVURT): study protocol for a randomised controlled trial
Source: PubMed Central journal article supplement (PMC4641424; doi:10.1186/s13063-015-1039-9), 2015-11-10

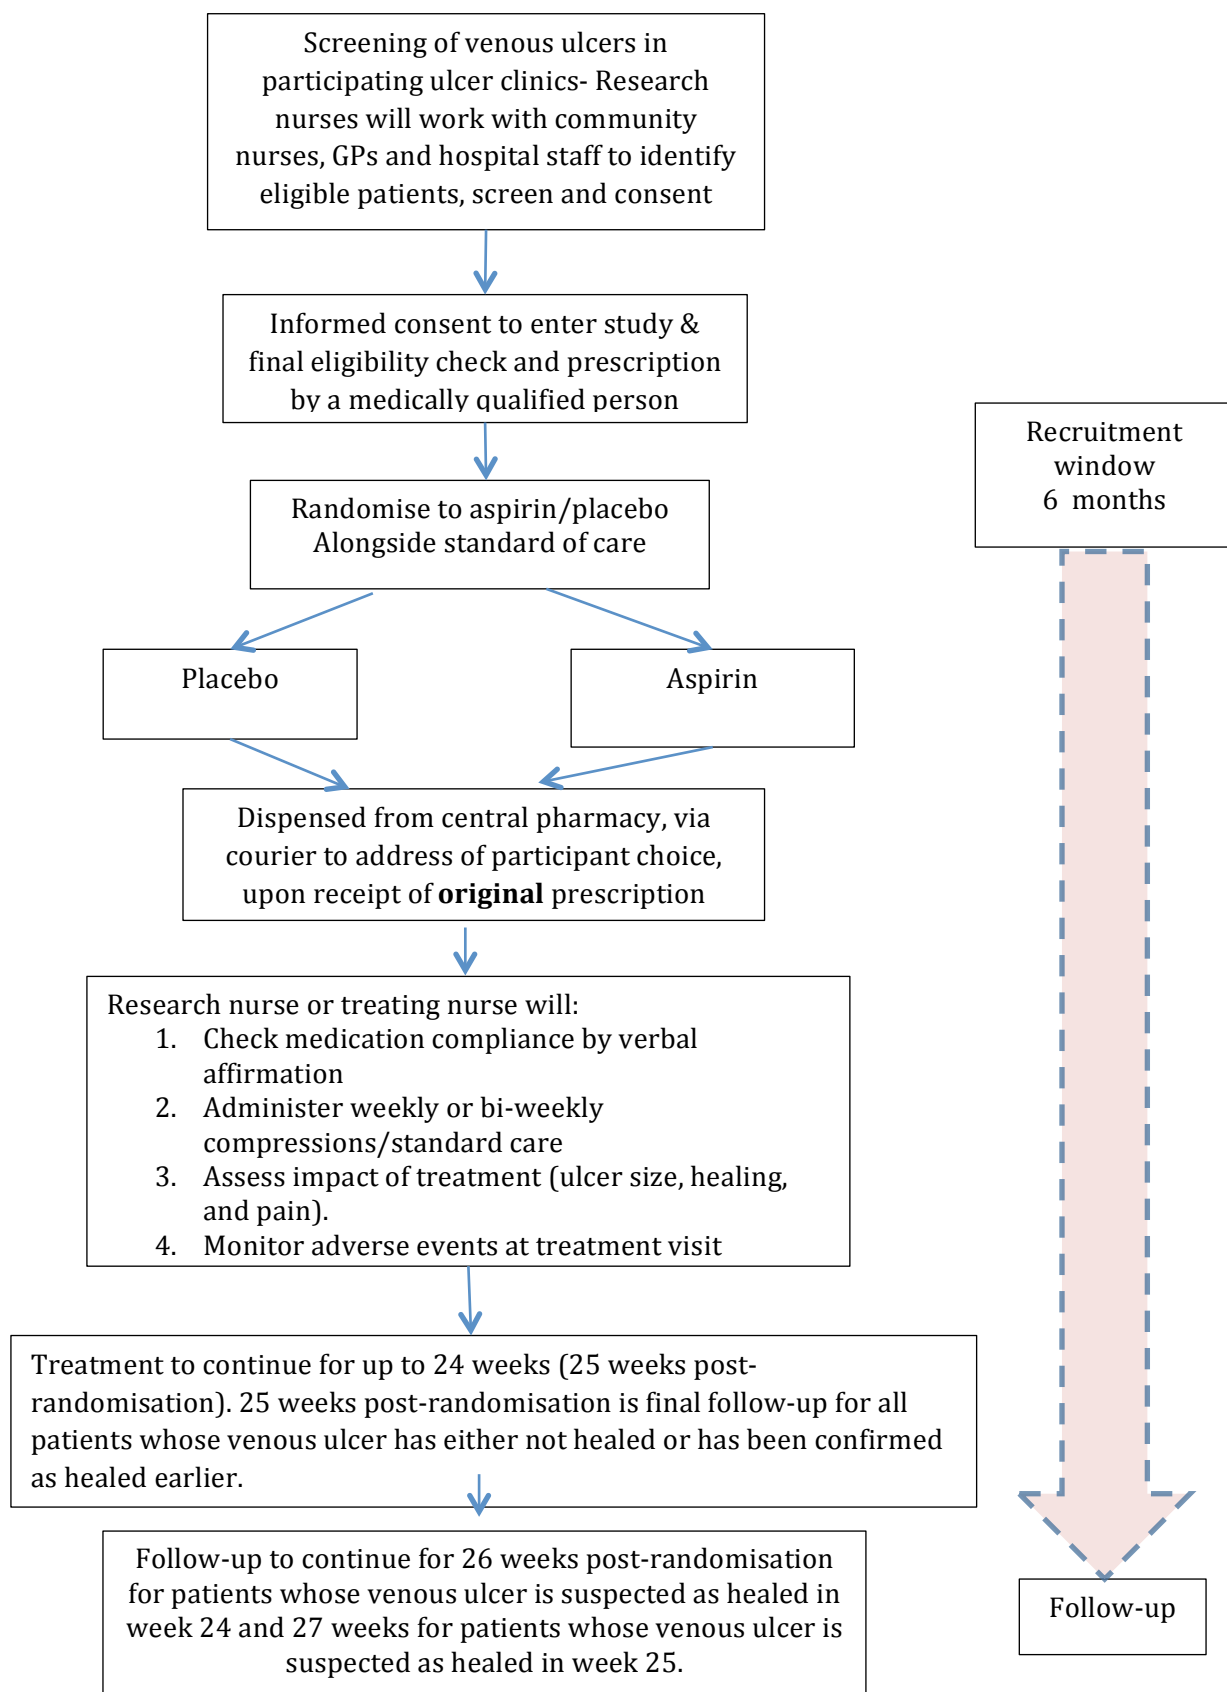

Supplement: 13063_2015_1039_MOESM2_ESM.pdf [file 13063_2015_1039_MOESM2_ESM.pdf]
